# Supplementary material
Source: MDPI journal article supplement (https://www.mdpi.com/2073-4441/13/23/3373)
Supplement: s1 [file s1]

## Supplementary Section

Table S1. Analysis of variance for Con-Still (Model 1)

| Model      | Degree of freedom | Sum of Squares | Mean square | F-Value | P-Value |
|------------|-------------------|----------------|-------------|---------|---------|
| Regression | 2                 | 19.812         | 6.62573     | 15.665  | 0.001   |
| Residual   | 52                | 33.094         |             |         |         |
| Total      | 54                | 52.906         |             |         |         |

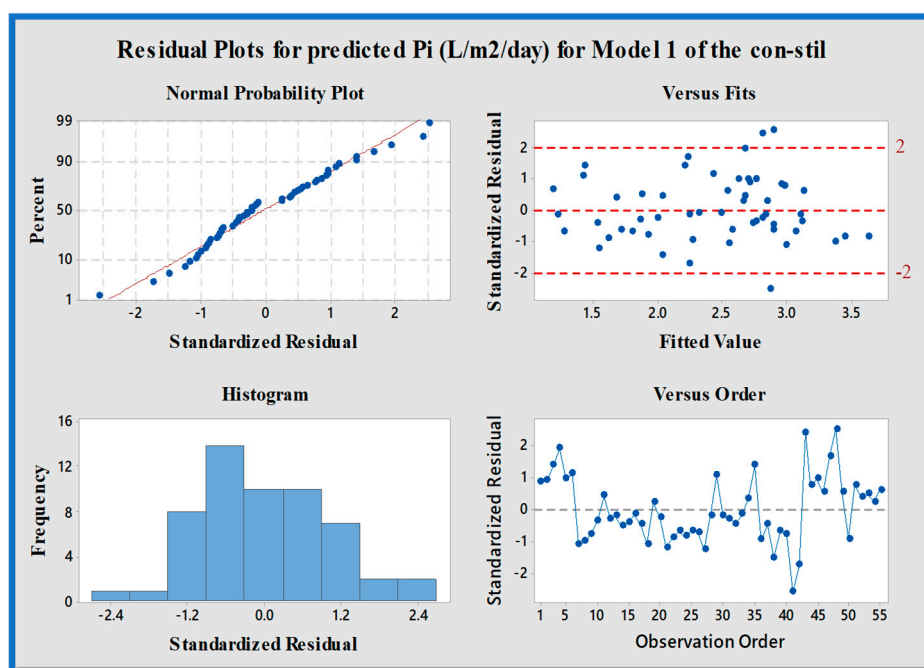

**Figure S1.** Plots of model diagnostics for Model 1 for Con-Still.

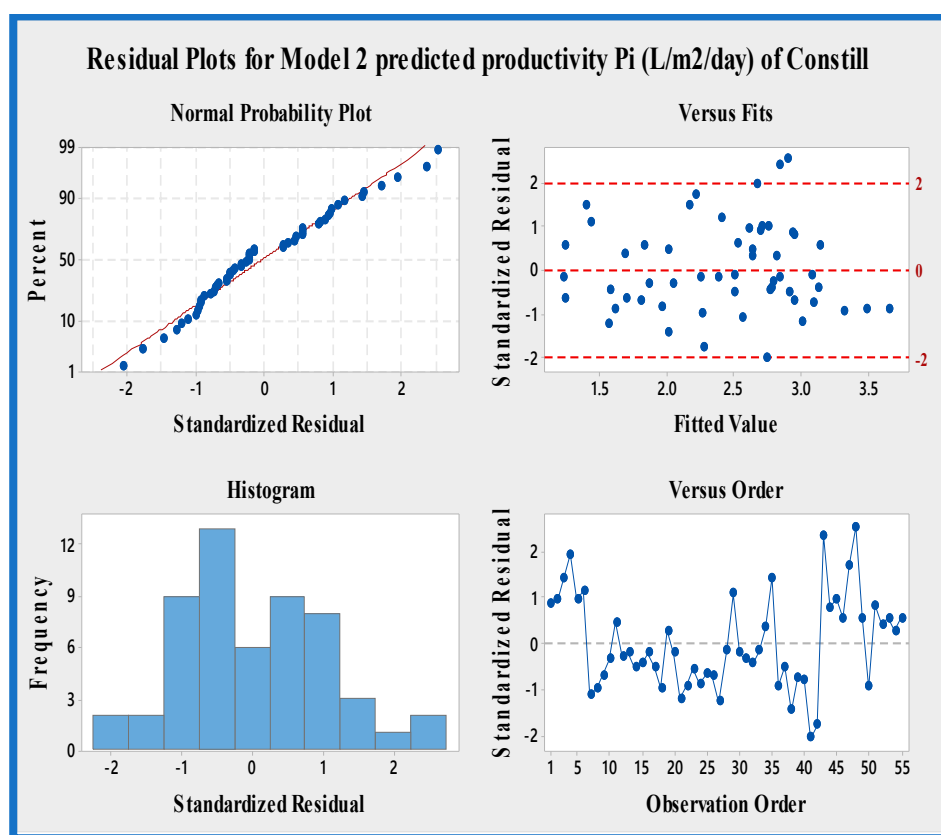

**Figure S2.** Plots of model diagnostics for Con-Still (Model 2).

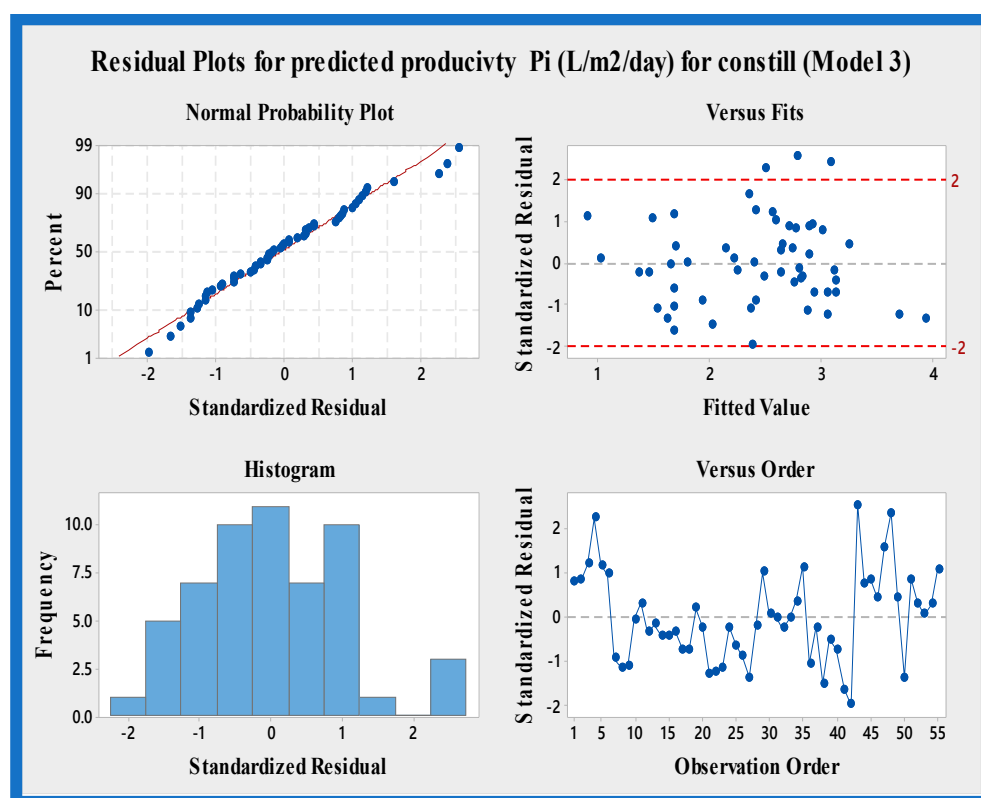

**Figure S3.** Plots of model diagnostics of Con-Still (Model 3).
